# Supplementary material for: Amot and Yap1 regulate neuronal dendritic tree complexity and locomotor coordination in mice
Source: PLoS Biol. 2019 May 1;17(5):e3000253. doi: 10.1371/journal.pbio.3000253 (PMC6513106; doi:10.1371/journal.pbio.3000253)
Supplement: S1 Data — (XLSX) [file pbio.3000253.s013.xlsx]

## Sheet: Fig 2A
Fig 2A RT-PCR analysis of Amot knockdown in neurons
	Amot mRNA normalized to Gapdh
	Control	Amot shRNA
	0.191123	0.0603865
	0.168841	0.066772
	0.231339	0.093126
mean	0.197101	0.0734282
SEM	0.0182876	0.0100199
mean normalized to Control [%]	100	37.2541
SEM normalized to Control [%]	9.27828	5.08365

## Sheet: Fig 2D
Fig 2D Total dendritic lenght analysis of Amot knockdown neurons
	Control	Amot	Amot shRNA	Amot shRNA + Amot
	880.375	1094.29	716.042	1285.64
	1449.07	1150.05	958.434	1406.29
	881.44	1465.36	376.333	551.529
	1423.23	1421.96	649.928	1199.93
	1288.5	513.683	754.212	1271.59
	734.591	1169.72	156.435	787.696
	1462.41	1000.9	229.595	756.816
	1477.24	1796.58	508.215	837.826
	1398.25	1213.09	616.232	649.849
	1591.01	1368.35	646.875	1174.06
	1241.8	989.535	62.0752	879.081
	1674.67	890.623	282.565	420.791
	1568.23	1847.15	457.454	1046.91
	1321.28	632.019	126.415	1215.38
	745.013	1359.19	478.156	1184.39
	808.705	1647.86	646.859	1017.02
	1015.04	1704.77	451.892	740.95
	992.983	1442.48	349.382	861.101
	850.758	1362.81	462.369	669.565
	730.82	1658.91	375.741	914.552
	1625.64	1367.87	178.366	1029.42
	1497.38	1437.56	356.725	1453.37
	1673.8	1831.69	194.246	287.95
	1474.59	1777.45	161.377	861.199
	1087.99	642.103	405.217	507.978
	1291.57	1462.15	166.121	565.523
	908.444	1251.13	101.994	1192.39
	1553.24	2245.73	635.405	1448.39
	1317.53	1516.36	239.311	317.52
	1568	1710.43	74.3022	704.1
	1323.9	1236.92	432.903	248.908
	1465.97	1113.28	310.519	1071.56
	1440.76	790.024	689.027	1020.33
	1916.99	1698.98	417.665	937.188
	1145.86	2059.82	164.078	895.142
	1665.49	2130.97	147.492	1019.29
	984.513	1803.1	158.348	976.898
	1213.66	1703.51	99.5293	19.2339
	1750.04		380.311	1352.92
	817.58		85.3889	1029.11
	1144.1		120.864	395.586
	1336.59		292.826	707.062
	1391.25		106.525	1197.58
	1754.48		254.573	920.865
	1083.67		709.168	291.765
	911.732		83.9117	1272.94
	1428.11		0	373.732
	1343.65		318.608	187.529
	1154.55		26.509	1130.93
	1229.27		118.886	1457.54
	1440.79		291.759	505.683
	1000.44		70.4894	1377.48
	806.282		1042.38	759.228
	1793.99		71.4223	1379.62
	1295		561.397	1668.24
	1454.75		227.309	225.059
	1474.02		871.25	283.479
	1003.57		243.193	582.864
	1048.57		178.251
	1485.98		600.401
mean [µm]	1280.65	1408.12	348.221	871.147
SEM	39.0668	67.1751	32.2493	51.6524

## Sheet: Fig 2E
Fig 2E Sholl analysis of Amot knockdown neurons
		Control		Amot		Amot shRNA		Amot shRNA + Amot
	µm	mean	SEM	mean	SEM	mean	SEM	mean	SEM
	10	1.5	0.122533	2.2	0.295723	1.8125	0.186614	1.71429	0.222481
	20	7.15	0.471924	7.2	0.462481	5.36842	0.484486	6.8	0.462481
	30	8.8	0.560343	9.4	0.515283	5.5	0.569204	8.2	0.445066
	40	9.55	0.609324	9.75	0.527784	5.42105	0.528961	8.4	0.626062
	50	9.75	0.644615	10.55	0.762891	4.52632	0.523957	7.45	0.604985
	60	9.3	0.718895	10.3	0.849864	3.66667	0.453959	6.8	0.626903
	70	8.6	0.646757	9.35	0.78602	2.94118	0.35786	6.5	0.667205
	80	7.65	0.633902	7.95	0.806529	2.41176	0.296566	5.35	0.534725
	90	6.6	0.559402	6.8	0.705954	2.2	0.318631	4.35	0.431086
	100	5.55	0.604985	5.65	0.604114	2	0.233661	3.78947	0.451011
	110	4.78947	0.580406	5.10526	0.471009	2	0.210919	3.94118	0.496917
	120	3.94444	0.409443	4.52632	0.513234	1.77778	0.186428	3.41176	0.500607
	130	3.27778	0.358316	3.57895	0.449385	2.28571	0.248926	2.76471	0.414998
	140	2.5	0.289661	3.15789	0.396444	2.33333	0.270931	2.25	0.264702
	150	2.41176	0.345299	2.72222	0.332756	3	0.223714	1.84615	0.220827
	160	1.875	0.243358	1.88889	0.228774	3	0	1.72727	0.225738
	170	1.53846	0.147701	1.6875	0.211742	2.5	0.158189	1.66667	0.223714
	180	1.66667	0.198574	1.58333	0.177396	2	0	1.55556	0.226799
	190	1.83333	0.168406	1.625	0.20495	1.5	0.158189	1.71429	0.248926
	200	1.6	0.200096	1.4	0.200096	2	0	1.83333	0.261531

## Sheet: Fig 2G
Fig 2G Total dendritic lenght analysis of Amot fl/fl neurons
	Amot fl/fl	Amot fl/fl + Cre
	3056.8	561.936
	1748.44	1757.04
	1976.43	932.413
	651.472	662.575
	1433.36	380.42
	1751.56	1124.36
	2168.86	650.216
	2004.13	620.825
	681.417	890.83
	640.046	1224.49
	1739.47	602.709
	1271.69	431.302
	986.677	330.644
	2079.56	393.556
	1786.27	588.668
	1495.63	749.187
	724.374	809.469
	1515.16	612.107
	736.518	536.366
	917.615	228.766
	416.493	269.778
	1415.41	627.75
	1318.5	673.415
	1502.07	702.423
	1482.77	1661.75
	1002.66	716.911
	1083.85	1436.55
	1357.83	800.719
	1794.21	924.884
	1342.67	1070.97
	1650.72	760.79
	1536.26	1309.28
	996.947	620.776
		1452.93
		1384.04
		984.316
		984.316
		799.006
		1168.53
		1126.83
mean [µm]	1402	839.096
SEM	95.6066	59.1718

## Sheet: Fig 2H
Fig 2H Sholl analysis of Amot fl/fl neurons
		Amot fl/fl		Amot fl/fl + Cre
	µm	mean	SEM	mean	SEM
	10	1.9	0.383383	2.55	0.42617
	20	5.6	0.52037	6.15	0.612773
	30	7.15	0.471924	6.6	0.499712
	40	8.8	0.626903	6.3	0.518849
	50	9.05	0.745428	5.65	0.499053
	60	9.25	0.774542	4.9	0.571052
	70	9.3	0.935439	4.35	0.685797
	80	8	1.05681	4	0.598529
	90	7.45	0.942103	3.1	0.532875
	100	6.9	0.906262	3.05	0.723915
	110	5.65	0.730435	2.2	0.550861
	120	5.35	0.769081	1.6	0.472622
	130	4.9	0.72546	1.5	0.545576
	140	3.85	0.625536	1.25	0.475262
	150	3.15	0.590889	0.85	0.357611
	160	2.55	0.545455	0.55	0.245871
	170	2.15789	0.518059	0.35	0.208792
	180	1.89474	0.54745	0.25	0.142878
	190	1.84211	0.704543	0.25	0.160257
	200	1.36842	0.466952	0.15	0.109477

## Sheet: Fig 2K
Fig 2K Total dendritic lenght analysis of Amot knockdown neurons - rescue experiment with Amot mutants
	Control	Amot shRNA	Amot shRNA + Amot	Amot shRNA + Amot ID domain	Amot shRNA + Amot ∆ID domain	Amot shRNA + Amot ∆AB
	834.826	54.4836	406.765	1076.74	1012.79	779.621
	1082.31	81.5784	414.451	621.995	784.282	1054.68
	1292.98	833.348	1203.84	122.983	784.282	714.534
	490.475	922.959	736.017	505.797	493.921	768.072
	1314.68	257.812	1172.55	521.576	759.82	1205.59
	873.513	169.827	390.513	367.692	745.169	1016.61
	864.02	0	561.192	675.301	130.569	386.394
	536.543	52.8464	561.192	249.555	749.881	996.324
	937.184	237.911	904.742	561.567	877.631	697.284
	1141.92	1242.53	519.62	359.291	356.058	286.867
	845.197	179.903	570.769	1056.53	925.848	944.708
	914.055	765.151	490.401	307.818	366.485	1252.57
	771.37	148.591	485.273	912.463	925.976	1345.52
	295.244	184.032	760.149	375.967	932.043	958.849
	802.222	0	542.038	404.036	274.778	371.635
	1030.77	781.426	902.816	143.077	214.51	1016.83
	1056.03	185.849	902.816	246.033	443.389	590.027
	839.428	197.922	577.129	294.058	957.749	837.381
	874.343	317.134	577.129	75.2409	839.589	921.428
	1065.54	250.555	541.423	164.725	456.375	881.215
	1166.43	173.109	871.362	1461.94	529.76	1020.32
	1076.52	89.6886	375.763	139.886	201.713	717.344
	1999.12	537.951	382.976	139.886	71.7083	875.141
	989.914	589.565	524.413	351.933	932.774	836.662
	1267.45	0	1066.99	837.981	562.993	576.23
	1153.65	0	183.01	577.07	521.545	191.668
	837.229	157.115	512.237	1379.53	231.281	552.878
	1296.59	73.8504	497.111	500.88	430.659	1930.36
	1359.61	231.429	1011.5	958.66	794.437	1255.08
	1468.62	371.372	602.948	521.919	114.412	735.559
	1834.13	144.796	246.553	910.553	992.278	919.357
	1700.07	712.1	1003.41	496.054	657.443	1045.67
	1243.94	247.693	346.844	1031.79	342.526	1036.63
	787.09	384.116	455.653	892.083	1571.27	575.926
	1327.63	0	465.018	1044.88	669.615	630.377
	1635.16	976.658	979.28	457.687	419.949	473.596
	1479.61	74.0359	696.869	638.145	0	1460.93
	1267	543.412	695.591		46.8129	1183.6
	1852.89	507.501	1235.8		1195.05	466.268
	673.912	284.724	460.836		1028.89	812.146
	1672.98	716.042	672.936		704.587	908.858
	1992.89	958.434	907.974		915.512	439.01
	1463.46	376.333	553.21		109.146	860.393
	1734.35	649.928	978.529		114.216	858.477
	1196	754.212	450.272		287.697	748.674
	644.495	156.435	436.166			628.632
	724.222	229.595	1418.15			612.322
	1037.27	508.215	617.166			712.173
	684.005	616.232	342.968			541.176
	1142.49	646.875	449.683			639.94
	1088.63	62.0752	1595.06			732.234
	1236.97	282.565	1595.06			1148.17
	1026.76	457.454	366.157			393.822
	1103.34	126.415	730.556			355.368
	669.045	478.156	623.204			274.826
	1192.74	646.859	1071.79			254.342
	1908.19	451.892	220.64			523.567
	1218.55	349.382	166.662			481.679
	1256.33	462.369	457.866			466.608
	1435.41	375.741	439.18
	1380.1	99.2213	1285.64
	1131.7	329.467	1406.29
	1457.33	29.156	551.529
	1611.81	168.306	1199.93
	747.938	502.183	1271.59
	1366.76	192.949	787.696
	1008.07	0	756.816
	880.375	115.47	837.826
	1449.07	0	649.849
	881.44	357.609	1174.06
	1423.23	314.921	879.081
	1288.5	187.427	420.791
	734.591	0	1046.91
	1462.41	200.881	1215.38
	1477.24	764.933	1184.39
	1398.25	0	1017.02
	1591.01	355.343	740.95
	1241.8	230.713	861.101
	1674.67	245.727	669.565
	1568.23	33.7712	914.552
	1321.28		1607.05
	745.013		1757.86
	808.705		689.411
	1015.04		1499.91
	992.983		1589.48
	850.758		984.62
	730.82		946.02
	1100.47		1047.28
	1811.34		812.311
	1101.8		1467.58
	1779.04		1098.85
	1610.63		525.988
	918.239		1308.63
	1828.02		1519.23
	1846.55		1480.49
	1747.82		1271.28
	1988.76		926.188
	1552.25		1076.38
	2093.33		836.956
	1960.28		1143.19
	1651.6
	931.266
	1010.88
	1268.8
	1241.23
	1063.45
	913.525
mean [µm]	1218.37	329.953	823.879	577.928	588.387	778.002
SEM	37.4901	31.3397	38.0132	59.4179	53.295	42.8995

## Sheet: Fig 3C
Fig 3C Total dendritic lenght analysis of Amot knockdown neurons - rescue experiment with Amot Yap binding mutant
	Control	Amot shRNA	Amot shRNA + Amot	Amot shRNA + Amot ∆Yap1
	834.826	54.4836	406.765	506.251
	1082.31	81.5784	414.451	237.966
	1292.98	833.348	1203.84	538.959
	490.475	922.959	736.017	863.918
	1314.68	257.812	1172.55	177.243
	873.513	169.827	390.513	188.019
	864.02	0	561.192	575.741
	536.543	52.8464	561.192	513.028
	937.184	237.911	904.742	739.008
	1141.92	1242.53	519.62	154.644
	845.197	179.903	570.769	559.257
	914.055	765.151	490.401	595.194
	771.37	148.591	485.273	1027.9
	295.244	184.032	760.149	438.998
	802.222	0	542.038	387.919
	1030.77	781.426	902.816	402.382
	1056.03	185.849	902.816	1064
	839.428	197.922	577.129	93.3259
	874.343	317.134	577.129	231.137
	1065.54	250.555	541.423	306.181
	1166.43	173.109	871.362	145.077
	1076.52	89.6886	375.763	727.703
	1999.12	537.951	382.976	688.159
	989.914	589.565	524.413	502.673
	1267.45	0	1066.99	868.534
	1153.65	0	183.01	882.89
	837.229	157.115	512.237	726.223
	1296.59	73.8504	497.111	230.932
	1359.61	231.429	1011.5	231.656
	1468.62	371.372	602.948	745.306
	1834.13	144.796	246.553	354.682
	1700.07	712.1	1003.41	163.401
	1243.94	247.693	346.844	954.799
	787.09	384.116	455.653	409.343
	1327.63	0	465.018	828.511
	1635.16	976.658	979.28	607.451
	1479.61	74.0359	696.869	0
	1267	543.412	695.591	332.467
	1852.89	507.501	1235.8	392.51
	673.912	284.724	460.836	324
	1672.98	716.042	672.936	959.423
	1992.89	958.434	907.974	136.74
	1463.46	376.333	553.21	848.102
	1734.35	649.928	978.529	43.5563
	1196	754.212	450.272	85.7401
	644.495	156.435	436.166	586.243
	724.222	229.595	1418.15	174.667
	1037.27	508.215	617.166	29.2941
	684.005	616.232	342.968	337.216
	1142.49	646.875	449.683	54.1994
	1088.63	62.0752	1595.06	151.158
	1236.97	282.565	1595.06	417.17
	1026.76	457.454	366.157	0
	1103.34	126.415	730.556	71.9943
	669.045	478.156	623.204	375.759
	1192.74	646.859	1071.79	0
	1908.19	451.892	220.64	396.181
	1218.55	349.382	166.662	313.171
	1256.33	462.369	457.866	617.897
	1435.41	375.741	439.18	155.144
	1380.1	99.2213	1285.64
	1131.7	329.467	1406.29
	1457.33	29.156	551.529
	1611.81	168.306	1199.93
	747.938	502.183	1271.59
	1366.76	192.949	787.696
	1008.07	0	756.816
	880.375	115.47	837.826
	1449.07	0	649.849
	881.44	357.609	1174.06
	1423.23	314.921	879.081
	1288.5	187.427	420.791
	734.591	0	1046.91
	1462.41	200.881	1215.38
	1477.24	764.933	1184.39
	1398.25	0	1017.02
	1591.01	355.343	740.95
	1241.8	230.713	861.101
	1674.67	245.727	669.565
	1568.23	33.7712	914.552
	1321.28		1607.05
	745.013		1757.86
	808.705		689.411
	1015.04		1499.91
	992.983		1589.48
	850.758		984.62
	730.82		946.02
	1100.47		1047.28
	1811.34		812.311
	1101.8		1467.58
	1779.04		1098.85
	1610.63		525.988
	918.239		1308.63
	1828.02		1519.23
	1846.55		1480.49
	1747.82		1271.28
	1988.76		926.188
	1552.25		1076.38
	2093.33		836.956
	1960.28		1143.19
	1651.6
	931.266
	1010.88
	1268.8
	1241.23
	1063.45
	913.525
mean [µm]	1218.37	329.953	823.879	424.517
SEM	37.4901	31.3397	38.0132	37.9781

## Sheet: Fig 4C
Fig 4C Total dendritic lenght analysis of Yap1 knockdown neurons
	Control	Yap1 shRNA	Yap1 shRNA + Yap1	Yap1 shRNA + Yap1 del60-89
	832.891	1277.27	826.662	771.976
	1632.18	684.883	1274.52	505.138
	1343.31	404.906	1348.61	805.507
	715.211	1074.5	1703.47	975.297
	1366.01	868.708	770.968	751.184
	1197.04	476.515	1372.88	971.568
	634.657	1327.19	616.652	757.933
	1118.28	1128.96	847.641	1177
	2013.29	928.579	1321.79	512.275
	1144.02	629.247	855.758	895.434
	1181.86	790.846	719.584	1282.27
	922.886	459.643	909.517	779.709
	1189.47	855.151	739.544	899.707
	1732.61	610.48	615.738	753.285
	740.523	589.932	1346.28	1442.27
	651.064	263.843	1015.58	1331.33
	1238.33	839.409	957.582	780.69
	1112.27	1176.19	1148.18	392.871
	1437.06	803.08	655.346	927.959
	1199.12	1283.73	1731.71	1153.94
	1873.05	470.947	1499.27	1246.01
	1103.77	724.25	898.507	1426.87
	1276.57	567.699	1002.01	1080.29
	1711.44	1586.61	1090.7	1356.37
	1256.48	1233.25	1917.81	1174.3
	1304.85	718.367	1964.63	1895.08
	1497.27	313.329	1387.78	1195.38
	1278.04	851.477	1310.05	1081.97
	1612.68	1227.31	1009.08	768.091
	1561.21	1356.51	1179.51	1080.57
	1881.6	825.191	1076.03	668.201
	851.919	1007.59	1314.45	956.76
	696.897	1403.48	669.666	824.506
	1450.52	1011.33	1148.08	1036.26
	998.818	1140.46	806.025	503.902
	813.629	1066.06	836.057	824.489
	696.228	849.075	712.722	1205.36
	1364.52	1750.06	612.218	1205.97
	1192.58	537.31	893.458	1121.07
	1982.42	969.88	961.682	885.266
		469.523	1123.53	700.218
		1159.1	754.627	963.591
		655.875	435.491	813.164
		830.836	1284.29	1032.22
		364.941	1035.51	838.322
		412.122		967.503
		694.987		1066.22
		685.985		1183.61
		528.935		1747.36
		539.032		1072.69
		540.474		550.957
		371.976
		352.386
		835.021
		616.484
		569.961
		241.5
		873.525
		541.967
		802.25
mean [µm]	1245.16	802.835	1060.03	987.057
SEM	59.7872	44.2122	51.5136	41.9269

## Sheet: Fig 4D
Fig 4D Sholl analysis of Yap1 knockdown neurons
		Control		Yap1 shRNA		Yap1 shRNA + Yap1		Yap1 shRNA + Yap1 del60-89
	µm	mean	SEM	mean	SEM	mean	SEM	mean	SEM
	10	3.05263	0.311719	2.3125	0.241206	2.73333	0.353385	1.73333	0.197699
	20	7.7	0.513747	4.9	0.416321	6.1	0.416321	5.55	0.555029
	30	9	0.580658	5.45	0.400684	7.25	0.475262	7.3	0.571974
	40	9.25	0.597979	5.25	0.527784	7.7	0.603351	7.6	0.549904
	50	8.9	0.480909	4.85	0.549305	7.2	0.639384	7.2	0.516305
	60	8.1	0.507557	3.9	0.440904	7.25	0.794685	6.95	0.535709
	70	7	0.620143	3.55	0.407205	6.15	0.697225	6.65	0.568162
	80	6.55	0.622158	2.95	0.419944	5.6	0.630255	6	0.56222
	90	5.95	0.638868	2.89474	0.459051	4.8	0.583374	5.75	0.561634
	100	5.65	0.504303	2.82353	0.455982	3.9	0.390193	5.3	0.581112
	110	4.84211	0.507211	2.64286	0.435278	3.57895	0.473488	4.57895	0.625313
	120	4.47059	0.31754	2.71429	0.467857	3.22222	0.395422	3.89474	0.600725
	130	3.17647	0.318697	2.46154	0.424618	3	0.424467	3.22222	0.500566
	140	2.41176	0.32668	2.30769	0.432107	2.6	0.302516	3.125	0.423483
	150	2.53333	0.326025	2.18182	0.385128	2.38462	0.296487	2.1875	0.338971
	160	2.30769	0.358229	2.375	0.462165	2.4	0.188652	2	0.223714
	170	2	0.273992	1.875	0.326116	1.75	0.231566	2	0.193742
	180	1.7	0.150995	1.66667	0.182661	1.8	0.187172	2.11111	0.283959
	190	1.5	0.169112	1.6	0.122533	1.5	0.129161	1.8	0.187172
	200	1.14286	0.0845558	1	0	1.5	0.129161	1.6	0.122533

## Sheet: Fig 4G
Fig 4G Total dendritic lenght analysis of Yap1 fl/fl neurons
	Yap1 fl/fl	Yap1 fl/fl + Cre
	1261.69	797.69
	726.047	303.867
	754.259	542.348
	1283.14	370.655
	555.101	623.257
	500.836	398.015
	1152.24	1007.75
	464.041	530.211
	798.828	333.406
	1061.84	286.015
	1081.14	0
	757.629	688.244
	675.502	573.612
	944.428	812.573
	860.728	439.175
	1105.49	662.112
	707.157	735.044
	1095.18	411.142
	1033.72	625.806
	1134.15	473.419
	893.45	391.565
	1332.49	338.536
	1028.05	675.857
	1202.49	456.203
	992.293	673.972
	810.347	384.408
	925.586	449.447
	786.542	419.339
	704.538	298.741
	958.96	659.34
	844.653	595.753
	1284.74	546.139
	1404.46	443.657
	1367.96	663.496
	961.079	833.633
	1017.59	472.126
	1155.03	220.352
	1248.57	203.399
	1008.23	682.287
	1442.83	567.831
	1651.92	1534.68
	1239.83	771.483
	1298.67	289.112
	1109.11	987.828
	830.254	655.311
	1236.82	696.003
	1314.27	824.528
	1472.91	830.741
	1443.13	635.862
	1497.68	430.688
	1325	727.427
	708.887	1119.3
	1700.65	482.564
mean [µm]	1059.48	576.905
SEM	39.7776	35.1111

[truncated: 82 more sheets: Fig 4H, Fig 5D, Fig 5F, Fig 5H, Fig 5I, Fig 5J, Fig 5L, Fig 6C, Fig 6D, Fig 6E, Fig 6F, Fig 6G, Fig 6I, Fig 6J, Fig 6K, Fig 7D, Fig 7F, Fig 7H, Fig 7I, Fig 7J …]
